# Supplementary material
Source: publisher site journal article supplement (https://www.dovepress.com/get_supplementary_file.php?f=376114.docx)
Supplement: Supplementary file 1 [file get_supplementary_file.php]

**Supplementary Data**

**Supplementary Figure 1: Conference Itinerary**

**
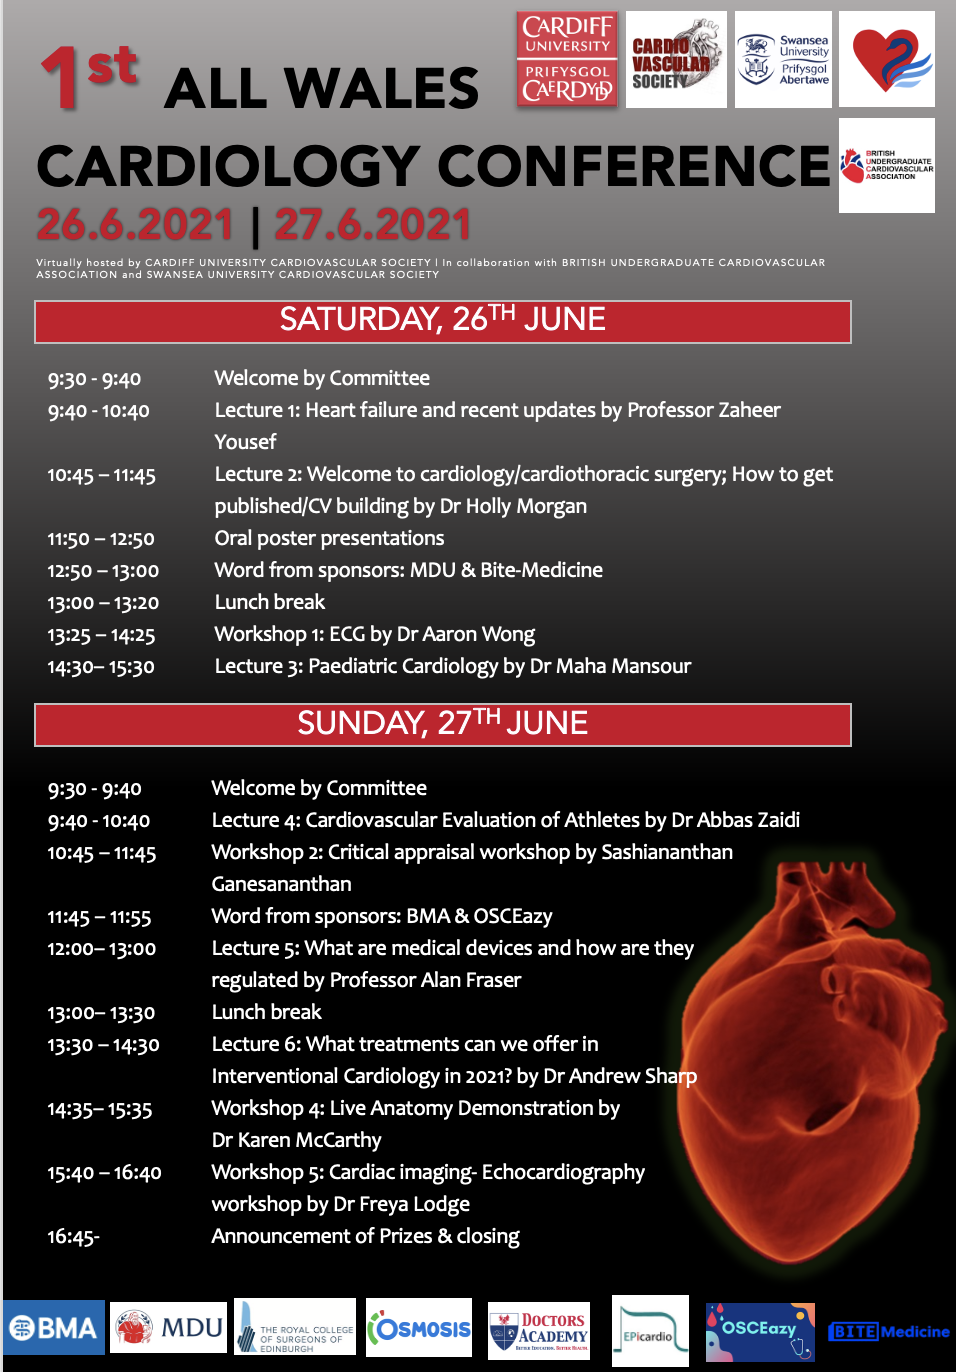
**

**Supplementary Figure 2: Questionnaire**

**Undergraduate Cardiology Conference**

Please fill in our feedback form so that we can evaluate and make appropriate changes onto future online conferences and event.

1. Gender

- Male
- Female
- Non-binary
- Prefer not to say

1. Age ………………
2. Country of Medical School

- Afghanistan
- Akrotiri
- Albania
- Algeria
- American Samoa
- Andorra
- Angola
- Anguilla
- Antarctica
- Antigua and Barbuda
- Argentina
- Armenia
- Aruba
- Ashmore and Cartier Islands
- Australia
- Austria
- Azerbaijan
- Bahamas
- Bahrain
- Bangladesh
- Barbados
- Bassas da India
- Belarus
- Belgium
- Belize
- Benin
- Bermuda
- Bhutan
- Bolivia
- Bosnia and Herzegovina
- Botswana
- Bouvet island
- Brazil
- British Indian Ocean Territory
- British Virgin Islands
- Brunei
- Bulgaria
- Burkina Faso
- Burma
- Burundi
- Cambodia
- Cameroon
- Canada
- Cape Verde
- Cayman Islands
- Central African Republic
- Chad
- Chile
- China
- Christmas Island
- Clipperton Island
- Cocos (Keeling) Islands
- Colombia
- Comoros
- Congo, Democratic Republic of the
- Congo, Republic of the
- Cook Islands
- Coral Sea Islands
- Costa Rica
- Cote d’lvoire
- Croatia
- Cuba
- Cyprus
- Czech Republic
- Denmark
- Dhekelia
- Djibouti
- Dominica
- Dominican Republic
- Ecuador
- Egypt
- El Salvador
- Equatorial Guinea
- Eritrea
- Estonia
- Ethiopia
- Europa Island
- Falkland Islands (Islas Malvinas)
- Faroe Islands
- Fiji
- Finland
- France
- French Guiana
- French Polynesia
- French Southern and Antarctic Lands
- Gabon
- Gambia
- Gaza Strip
- Georgia
- Germany
- Ghana
- Gibraltar
- Glorioso Islands
- Greece
- Greenland
- Grenada
- Guadeloupe
- Guam
- Guatemala
- Guernsey
- Guinea
- Ginea-Bissau
- Guyana
- Haiti
- Heard Island and McDonald Islands
- Holy See (Vatican City)
- Honduras
- Hong Kong
- Hungary
- Iceland
- India
- Indonesia
- Iran
- Iraq
- Ireland
- Isle of Man
- Israel
- Italy
- Jamaica
- Jan Mayen
- Japan
- Jersey
- Jordan
- Juan de Nova Island
- Kazakhstan
- Kenya
- Kiribati
- Korea, North
- Korea, South
- Kuwait
- Kyrgyzstan
- Laos
- Latvia
- Lebanon
- Lesotho
- Liberia
- Libya
- Liechtenstein
- Lithuania
- Luxembourg
- Macau
- Macedonia
- Madagascar
- Malawi
- Malaysia
- Maldives
- Mali
- Malta
- Marshall Islands
- Martinique
- Mauritania
- Mauritius
- Mayotte
- Mexico
- Micronesia, Federated States of
- Moldova
- Monaco
- Mongolia
- Montenegro
- Montserrat
- Morocco
- Mozambique
- Namibia
- Nauru
- Navassa Island
- Nepal
- Netherlands
- Netherlands Antilles
- New Caledonia
- New Zealand
- Nicaragua
- Niger
- Nigeria
- Niue
- Norfolk Island
- Northern Mariana Islands
- Norway
- Oman
- Pakistan
- Palau
- Panama
- Papua New Guinea
- Paracel Islands
- Paraguay
- Peru
- Philippines
- Pitcairn Islands
- Poland
- Portugal
- Puerto Rico
- Qatar
- Reunion
- Romania
- Russia
- Rwanda
- Saint Helena
- Saint Kitts and Nevis
- Saint Lucia
- Saint Pierre and Miquelon
- Saint Vincent and the Grenadines
- Samoa
- San Marino
- Sao Tome and Principe
- Saudi Arabia
- Senegal
- Serbia
- Seychelles
- Sierra Leone
- Singapore
- Slovakia
- Slovania
- Solomon Islands
- Somalia
- South Africa
- South Georgia and the South Sandwich Islands
- Spain
- Spratly Islands
- Sri Lanka
- Sudan
- Suriname
- Svalbard
- Swaziland
- Sweden
- Switzerland
- Syria
- Taiwan
- Tajikistan
- Tanzania
- Thailand
- Timor-Leste
- Togo
- Tokelau
- Tonga
- Trinidad and Tobago
- Tromelin Island
- Tunisia
- Turkey
- Turkmenistan
- Turks and Caicos Islands
- Tuvalu
- Uganda
- Ukraine
- United Arab Emirates
- United Kingdom
- United states
- Uruguay
- Uzbekistan
- Vanuatu
- Venezuela
- Vietnam
- Virgin Islands
- Wake Island
- Wallis and Futuna
- West Bank
- Western Sahara
- Yemen
- Zambia
- Zimbabwe

1. Which medical School do you study at? If you are from an non-UK medical school, please write it down in “other”.

- University of Aberdeen School of Medicine
- Anglia Ruskin University School of Medicine
- Aston University Medical School
- Barts and The London School of Medicine and Dentistry
- University of Birmingham College of Medical and Dental Sciences
- Brighton and Sussex Medical School
- University of Bristol Medical School
- University of Buckingham Medical School
- University of Cambridge School of Clinical Medicine
- Cardiff University School of Medicine
- University of Dundee School of Medicine
- Edge Hill University Medical School
- The University of Edinburgh Medical School
- University of Exeter Medical School
- University of Glasgow School of Medicine
- Hull York Medical School
- Imperial College London Faculty of Medicine
- Keele University School of Medicine
- Kent and Medway Medical School
- King’s College London GKT School of Medical Education
- Lancaster University Medical School
- University of Leeds School of Medicine
- University of Leicester Medical School
- University of Liverpool School of Medicine
- London School of Hygiene & Tropical Medicine
- University of Manchester Medical School
- Newcastle University School of Medical Education
- Norwich Medical School
- University of Nottingham School of Medicine
- University of Nottingham-Lincoln Medical School
- University of Oxford Medical Sciences Division
- Plymouth University Peninsula Schools of Medicine and Dentistry
- Queen’s University Belfast School of Medicine
- University of Sheffield Medical School
- University of Southampton School of Medicine
- University of St Andrews School of Medicine
- St George’s, University of London
- University of Sunderland School of Medicine
- Swansea University Medical School
- University of Central Lancashire School of Medicine
- University College London Medical School
- University of Warwick Medical School
- Other:………..

1. Have you taken an additional degree?

- BSc
- BmedSci
- MSc
- Mres
- MD
- PhD/Dphil
- BDS
- I do not have an additional degree

1. Are you interested in pursuing cardiology in the future?

|  | 1 | 2 | 3 | 4 | 5 | 6 | 7 | 8 | 9 | 10 |  |
| --- | --- | --- | --- | --- | --- | --- | --- | --- | --- | --- | --- |
| Not interested at all |  |  |  |  |  |  |  |  |  |  | Extremely interested |

1. Have you ever attended a conference in-person?

- Yes, a cardiology conference +/- other speciality Conferences
- Yes, other (not cardiology) speciality conferences
- Never

1. Have you ever attended a virtual conference?

- Yes
- No

1. How did you hear about the conference?

- Facebook
- Twitter
- Instagram
- Mailaing list from the society
- Word of mouth
- Other:…………

1. To what extent do you agree/disagree with the following statement. “Webinar conferences offer flexibility and convenience eg. not having to spend time and money travelling”

|  | 1 | 2 | 3 | 4 | 5 |  |
| --- | --- | --- | --- | --- | --- | --- |
| Strongly Disagree |  |  |  |  |  | Strongly Agree |

1. What type of conferences do you prefer?

- In-person conference
- Virtual conference
- Hybrid conference

1. To what extent has the conference improved/increased your knowledge/skill/interest in the following (0 – not at all, 5 – significantly improved/increased)

|  | 0 (Not at all) | 1 | | 2 | | | 3 | | 4 | | 5 (Very much so) |
| --- | --- | --- | --- | --- | --- | --- | --- | --- | --- | --- | --- |
| Interest in cardiology |  |  | |  | | |  | |  | |  |
| Likelihood to apply for cardiology |  |  | |  | | |  | |  | |  |
| Knowledge about a career in cardiology |  |  | |  | | |  | |  | |  |
| Core cardiology Knowledge |  |  | |  | | |  | |  | |  |
| Critical analysis skills |  |  | |  | | |  | |  | |  |
| Basic echocardiography skills |  | |  | |  |  | |  | |  | |

1. Did anything about the virtual conference make it more or less appealing than a traditional conference?

|  | More | Less | Unsure | Equal |
| --- | --- | --- | --- | --- |
| Opportunity to present |  |  |  |  |
| Comfort to present |  |  |  |  |
| Appropriate level for me |  |  |  |  |
| Student led/organised |  |  |  |  |
| Duration of event |  |  |  |  |
| Cost |  |  |  |  |
| Travel time |  |  |  |  |
| Environment/sustainable |  |  |  |  |
| Conference surroundings (i.e. your current location and surroundings) |  |  |  |  |
| Networking opportunities |  |  |  |  |
| Partners/ sponsors |  |  |  |  |
| Weekend conference |  |  |  |  |
| Learning from other delegates |  |  |  |  |

1. Did you enjoy the conference?

|  | 1 | 2 | 3 | 4 | 5 |  |
| --- | --- | --- | --- | --- | --- | --- |
| Not at all |  |  |  |  |  | Very much so |

1. How likely are you to recommend this conference to another peer?

|  | 1 | 2 | 3 | 4 | 5 |  |
| --- | --- | --- | --- | --- | --- | --- |
| Not at all |  |  |  |  |  | Very much so |

1. How easy was it to use the platform? (Zoom)

|  | 1 | 2 | 3 | 4 | 5 |  |
| --- | --- | --- | --- | --- | --- | --- |
| Not easy at all |  |  |  |  |  | Very easy |

1. I find it easy to ask question in a virtual conference?

|  | 1 | 2 | 3 | 4 | 5 |  |
| --- | --- | --- | --- | --- | --- | --- |
| Not easy at all |  |  |  |  |  | Very easy |

1. I find it easy to ask questions in an in person conference

|  | 1 | 2 | 3 | 4 | 5 |  |
| --- | --- | --- | --- | --- | --- | --- |
| Not easy at all |  |  |  |  |  | Very easy |

1. Do you think virtual conferences has provided students with opportunities that COVID-19 would have otherwise affected?

- Yes
- No
- Maybe

1. Any other comments, issues or suggestions regarding the conference (i.e would you have like other types of sessions? Please specify)

……………………………………………………………………………………………………………………………………………………………………………………………………………………………………………………………………………………………………………………………………………………………………………………………………………………………………………….

**Supplementary Table 1: Country Data**

| Country of medical school | N (%) |
| --- | --- |
| Albania | 1 (0.2) |
| Antigua and Barbuda | 1 (0.2) |
| Armenia | 5 (1.0) |
| Australia | 3 (0.6) |
| Bangladesh | 7 (1.4) |
| Barbados | 1 (0.2) |
| Belarus | 1 (0.2) |
| Belgium | 2 (0.4) |
| Bosnia and Herzegovina | 1 (0.2) |
| Brazil | 3 (0.6) |
| Bulgaria | 23 (4.7) |
| Burma | 9 (1.8) |
| Cambodia | 31 (6.3) |
| China | 15 (3.1) |
| Croatia | 1 (0.2) |
| Cyprus | 2 (0.4) |
| Czech Republic | 1 (0.2) |
| Egypt | 10 (2.0) |
| Georgia | 17 (3.5) |
| India | 69 (14.1) |
| Indonesia | 1 (0.2) |
| Iraq | 7 (1.4) |
| Ireland | 1 (0.2) |
| Jordan | 4 (0.8) |
| Libya | 2 (0.4) |
| Macedonia | 6 (1.2) |
| Malaysia | 69 (14.1) |
| Malta | 4 (0.8) |
| Mauritius | 2 (0.4) |
| Mexico | 1 (0.2) |
| Morocco | 1 (0.2) |
| Nepal | 6 (1.2) |
| Nigeria | 1 (0.2) |
| Pakistan | 15 (3.1) |
| Peru | 2 (0.4) |
| Philippines | 26 (5.3) |
| Poland | 5 (1.0) |
| Romania | 21 (4.3) |
| Russia | 7 (1.4) |
| Serbia | 2 (0.4) |
| Singapore | 1 (0.2) |
| Slovakia | 1 (0.2) |
| South Africa | 1 (0.2) |
| Sri Lanka | 4 (0.8) |
| Sudan | 2 (0.4) |
| Sweden | 1 (0.2) |
| Taiwan | 1 (0.2) |
| Tunisia | 1 (0.2) |
| Turkey | 2 (0.4) |
| Ukraine | 18 (3.7) |
| United Kingdom | 63 (12.9) |
| United States | 2 (0.4) |
| Uzbekistan | 1 (0.2) |
| Vietnam | 5 (1.0) |
| Yemen | 1 (0.2) |

**Supplementary Figure 3**


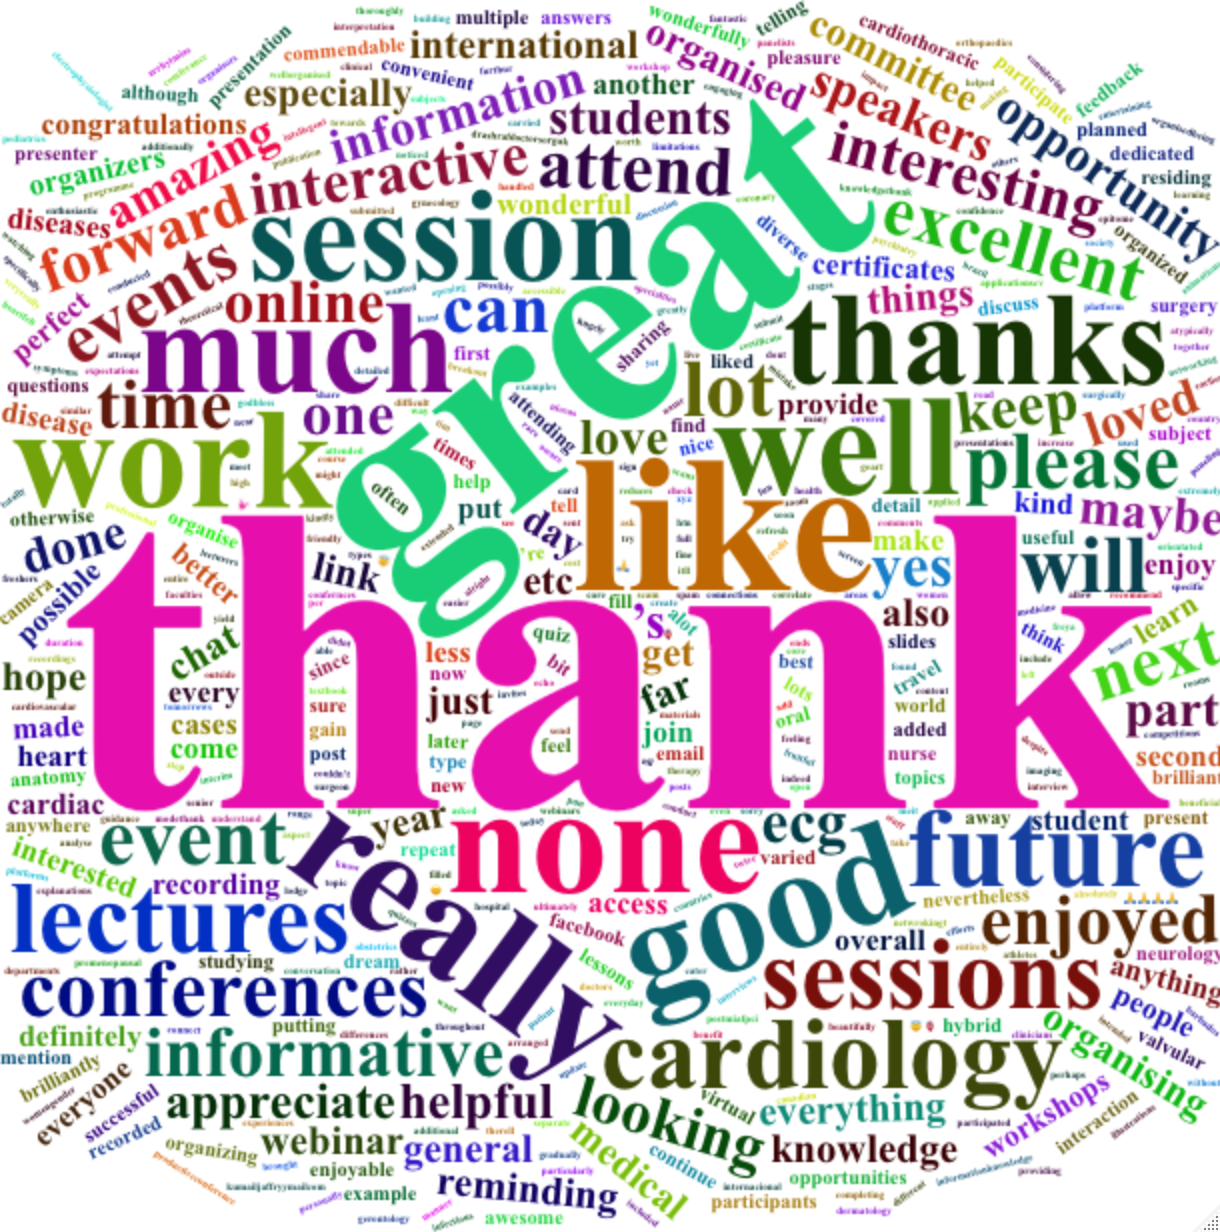


Supplementary Figure 3 shows the Word cloud analysis of participants' free text responses regarding any other comments, issues or suggestions regarding the conference
